# Supplementary material for: Evidence for Sexual Dimorphism in the Response to TLR3 Activation in the Developing Neonatal Mouse Brain: A Pilot Study
Source: Front Physiol. 2019 Mar 26;10:306. doi: 10.3389/fphys.2019.00306 (PMC6443881; doi:10.3389/fphys.2019.00306)
Supplement: TABLE S1 — Manuscript’s dataset. [file Table_1.XLSX]

## Sheet: Caspase-3
Sex	NS_6h	PIC_6h	NS_14h	PIC_14h
1	0.21	0.22	0.19	0.23
2	0.21	0.45	0.38	0.19
1	0.28	0.2	0.33	0.45
2	0.28	0.44	0.4	0.26
1	0.46	0.18	0.17	0.15
2	0.28	0.67	0.39	0.44
1	0.3	0.27	0.45	0.09
2	0.32	0.35	0.31	0.29
1	0.22	0.19	0.39	0.26

## Sheet: Caspase-8
Sex	NS_6h	PIC_6h	NS_14h	PIC_14h
1	0.18	0.08	0.17	0.3
2	0.24	0.43	0.08	0.09
1	0.1	0.03	0.16	0.3
2	0.08	0.32	0.12	0.12
1	0.04	0.09	0.13	0.07
2	0.05	0.32	0.08	0.12
1	0.04	0.09	0.22	0.03
2	0.17	0.37	0.09	0.13
1	0.12	0.09	0.17	0.07

## Sheet: NFkB
Sex	NS_6h	PIC_6h	NS_14h	PIC_14h
1	0.12	0.13	0.17	0.17
2	0.18	0.14	0.26	0.15
1	0.15	0.12	0.14	0.18
2	0.14	0.11	0.2	0.2
1	0.18	0.13	0.15	0.29
2	0.15	0.14	0.16	0.15
1	0.13	0.13	0.19	0.48
2	0.14	0.15	0.14	0.27
1	0.11	0.12	0.17	0.42
2	0.12	0.17	0.15	0.23

## Sheet: IRF3 WB
sex	group	% change from NS group
1	1	117.64
1	2	84.52
1	3	58.34
1	4	256.41
2	1	139.19
2	2	849.46
2	3	112.31
2	4	171.6
1	1	137.66
1	2	229.07
1	3	93.31
1	4	452.12
2	1	143.58
2	2	203.46
2	3	123.97
2	4	204.95
1	1	78.58
1	2	174.79
1	3	231.83
1	4	410.74
2	1	75.69
2	2	203.78
2	3	66.74
2	4	154.08
1	1	115.71
1	2	141.86
1	3	69.31
1	4	183.57
2	1	114.01
2	2	165.25
2	3	58.98
2	4	192.69
1	1	50.42
1	2	104.19
1	3	110.15
1	4	101.37
2	1	67.96
2	2	83.64
2	3	39.67
2	4	79.22
1	2
1	3	37.06
1	4	265.54
2	1	59.57
2	2	256.23
2	3	198.33
2	4	210.19

## Sheet: GFAP WB
Sex	Rx	6h	14h
1	1	107.79	108.47
1	1	105.83	108.42
1	1	94.17	84.82
1	1	83.47	68.01
1	2	111.94	134.82
1	2	99.45	122.42
1	2	71.57	135.7
1	2	81.03	159.69
2	1	107.73	88
2	1	92.58	109.82
2	1	68.25	65.68
2	1	67.03	90.45
2	2	91.83	132.17
2	2	95.22	100.98
2	2	53.81	90.84
2	2	86.33	71.95

## Sheet: PCR
Sex	Time	Infb	IL-1b	CXCLL10	TNF-a	CXCL1	IL6	IL10	CHOP
Male	6h	1.34	1.89	1.71	0.59	0.99	1.61	0.47
Male	6h	1.63	5.09	4.22	1.71	12.36	1.85
Male	6h		13.5	299.96	9.32	16.32	12.26	1.16
Male	6h	32	5.43	1776.72	4.2	33.24	6.61	4.87
Male	6h	9.42	3.91	578.68	4.3	26.99	11.12	2.31
Male	6h			389.37	6.62	10.02		0.55
Female	6h	7.46	3.83	368.83	2.51	19.13	5.08	2.64
Female	6h	8.22	9.16	865.99	7.53	56.8	12.77
Female	6h	24.42	11.91	593.9	0.14	45.15	2.04	1.58
Female	6h	33.47	4.91	666.66	15.67	46.78	10.15	1.02
Female	6h	14.42	6.44		3.06	83.87	7.02	3.85
Female	6h	6.89	7.67	521.92	1.24	13.19	4.17	0.76
Male	14h	8.85	8.01	38.99	9.02	21.63	2.3	0.33
Male	14h	4.44	25.46	620.72	18.77	106.15	9.65
Male	14h	17.33	2.69	9.25	1.18	9.99	0.82	0.71
Male	14h	7.29	3.61	19.74	2.9	4.91	0.8	0.73
Male	14h	6.73	3.4	62.36	7.01	51.02	1.87	0.58
Male	14h	13.64	2.79	118.05	3.67	23.1	3.53	0.24
Female	14h	4.36	5.15	81.72	7.47	19.79	1.36	0.57
Female	14h	1.63	38.99	119.01	14.51	22.71	0.99	0.9
Female	14h	24	4.29	19.26	4.36	19.22	0.88	0.11
Female	14h	13.09	31.14	54.35	4.24	44.66	1.83	0.76
Female	14h	0.86	12.81	141.09	15.12	29.52	1.17	2.22
Female	14h	0.68	0.95	3.27	0.66	3.9	0.57	1.08
Male	24h	0.05		4.41		3.74	0.35		0.29
Male	24h	2.79	1.87	27.45	3.09	6.09	5.36	2.11	5.67
Male	24h	14.1	4.35	55.14		16.35	1.44	3.79	3.02
Male	24h	0.68	2.95	2.14	1.69	1.8	2.47	0.69	0.81
Male	24h	0.66	3.94	35.01	3.36	4.52	0.69	0.73	2.09
Male	24h	4.75	1.97	11.67	2.08	2.04	2.27	1.8	2.05
Female	24h	0.6	1.17	7.26	1.05	4.37	1.24	0.42	1.22
Female	24h	2.81	1.78	8.89	1.16	8.45	3.56	3.56	1.6
Female	24h	0.15		6.32	6.18	5.55	0.85	1.49	1.84
Female	24h	2.9	4.34	24.42	2.75	29.73	0.32	0.65	2.49
Female	24h	0.07	3.56	6.53	2.93	3.77	1	0.47	1.15
Female	24h	0.03		11.05		3.83	0.2		1.21
Male	7d	6.7	9.5	3.45	0.73	6.74			2.93
Male	7d	1.44	2.11	1.54	1.13	9.64	11.05	3.64	4.01
Male	7d	5.86	0.15	0.39	0.08		0.26	0.56	1.49
Male	7d	8.92		2.4	0.06	3.67	3.87	1.28	7.43
Male	7d	4.1			0.48			3.59
Male	7d	4.98	3.38	1.2	13.59	1.29	3.73		2.89
Female	7d			1.02	0.52	2.45	0.54	0.16	1.54
Female	7d	1.71	2.1	2.92		1.5	1.37	0.64	0.2
Female	7d	0.01	1.07	2.46	2.52			0.41	0.61
Female	7d		0.76	2.71	1.9	2.25	1.11	0.09	0.74
Female	7d	0.22	0.44	1.34	1.15	0.77		0.62	0.59
Female	7d	0.06	0.88	1.14		0.85	0.31		0.52

## Sheet: GFAP_IHC
Tissue	Time	Sex	Rx	% area
CA1	24h	Male	Sal	17.7
CA1	24h	Male	Sal	27.8
CA1	24h	Male	Sal	23.1
CA1	24h	Male	Sal	22.6
CA1	24h	Male	Sal	15.7
CA1	24h	Male	Sal	22.6
CA1	24h	Male	PIC	42
CA1	24h	Male	PIC	50.7
CA1	24h	Male	PIC	51.4
CA1	24h	Male	PIC	34.8
CA1	24h	Male	PIC	45.9
CA1	24h	Male	PIC	45.9
CA1	7d	Male	Sal	23.7
CA1	7d	Male	Sal	15.7
CA1	7d	Male	Sal	20.7
CA1	7d	Male	Sal	20.5
CA1	7d	Male	Sal	13.8
CA1	7d	Male	Sal	20.1
CA1	7d	Male	PIC	27.8
CA1	7d	Male	PIC	24.9
CA1	7d	Male	PIC	23.7
CA1	7d	Male	PIC	28.6
CA1	7d	Male	PIC	30.7
CA1	7d	Male	PIC	20.7
CA1	24h	Female	Sal	20.1
CA1	24h	Female	Sal	17.1
CA1	24h	Female	Sal	23.5
CA1	24h	Female	Sal	16.8
CA1	24h	Female	Sal	19.2
CA1	24h	Female	Sal	20.9
CA1	24h	Female	PIC	54.3
CA1	24h	Female	PIC	55.1
CA1	24h	Female	PIC	59.7
CA1	24h	Female	PIC	57.9
CA1	7d	Female	Sal	23.8
CA1	7d	Female	Sal	21.3
CA1	7d	Female	Sal	21.2
CA1	7d	Female	Sal	23.4
CA1	7d	Female	Sal	25.7
CA1	7d	Female	Sal	25.7
CA1	7d	Female	PIC	29.3
CA1	7d	Female	PIC	40.6
CA1	7d	Female	PIC	60.1
CA1	7d	Female	PIC	49.8
DG	24h	Male	Sal	35.1
DG	24h	Male	Sal	22.8
DG	24h	Male	Sal	22.5
DG	24h	Male	Sal	25.4
DG	24h	Male	Sal	19.9
DG	24h	Male	Sal	18.2
DG	24h	Male	PIC	58.4
DG	24h	Male	PIC	47.4
DG	24h	Male	PIC	45.1
DG	24h	Male	PIC	44.9
DG	24h	Male	PIC	44.5
DG	24h	Male	PIC	47.3
DG	7d	Male	Sal	31.2
DG	7d	Male	Sal	32.6
DG	7d	Male	Sal	27.3
DG	7d	Male	Sal	20.9
DG	7d	Male	Sal	23.6
DG	7d	Male	Sal	20.1
DG	7d	Male	PIC	34.9
DG	7d	Male	PIC	41.2
DG	7d	Male	PIC	24.2
DG	7d	Male	PIC	27
DG	7d	Male	PIC	30.8
DG	7d	Male	PIC	30.8
DG	24h	Female	Sal	23.8
DG	24h	Female	Sal	16.7
DG	24h	Female	Sal	16.5
DG	24h	Female	Sal	26.3
DG	24h	Female	Sal	13.7
DG	24h	Female	Sal	19.6
DG	24h	Female	PIC	59.3
DG	24h	Female	PIC	54.8
DG	24h	Female	PIC	57.1
DG	24h	Female	PIC	58.8
DG	24h	Female	PIC	58.3
DG	7d	Female	Sal	26.7
DG	7d	Female	Sal	32.2
DG	7d	Female	Sal	36.3
DG	7d	Female	Sal	28.1
DG	7d	Female	Sal	21.7
DG	7d	Female	Sal	20.3
DG	7d	Female	PIC	32.2
DG	7d	Female	PIC	30.5
DG	7d	Female	PIC	27.1
DG	7d	Female	PIC	28.7
DG	7d	Female	PIC	25.5
Thal	24h	Male	Sal	1
Thal	24h	Male	Sal	2.6
Thal	24h	Male	Sal	4.3
Thal	24h	Male	Sal	4.4
Thal	24h	Male	Sal	0.8
Thal	24h	Male	Sal	1
Thal	24h	Male	PIC	46.8
Thal	24h	Male	PIC	21.9
Thal	24h	Male	PIC	2.4
Thal	24h	Male	PIC	1.2
Thal	24h	Male	PIC	1.7
Thal	24h	Male	PIC	4.2
Thal	7d	Male	Sal	4.6
Thal	7d	Male	Sal	2.7
Thal	7d	Male	Sal	2.9
Thal	7d	Male	Sal	5.4
Thal	7d	Male	Sal	1.1
Thal	7d	Male	Sal	1.6
Thal	7d	Male	PIC	11.2
Thal	7d	Male	PIC	17.7
Thal	7d	Male	PIC	16.5
Thal	7d	Male	PIC	8.1
Thal	7d	Male	PIC	6.6
Thal	7d	Male	PIC	10.4
Thal	24h	Female	Sal	6.7
Thal	24h	Female	Sal	12.6
Thal	24h	Female	Sal	2.2
Thal	24h	Female	Sal	2.5
Thal	24h	Female	Sal	5.2
Thal	24h	Female	Sal	2.3
Thal	24h	Female	PIC	15.7
Thal	24h	Female	PIC	19.6
Thal	24h	Female	PIC	1.7
Thal	24h	Female	PIC	5.4
Thal	7d	Female	Sal	1.4
Thal	7d	Female	Sal	1.6
Thal	7d	Female	Sal	2.7
Thal	7d	Female	Sal	3.9
Thal	7d	Female	Sal	3.7
Thal	7d	Female	Sal	2.7
Thal	7d	Female	PIC	19
Thal	7d	Female	PIC	7.5
Thal	7d	Female	PIC	7.6
Thal	7d	Female	PIC	7.5
Cing	24h	Male	Sal	13.7
Cing	24h	Male	Sal	9.2
Cing	24h	Male	Sal	5.9
Cing	24h	Male	Sal	10.8
Cing	24h	Male	Sal	6
Cing	24h	Male	Sal	12.7
Cing	24h	Male	PIC	31.4
Cing	24h	Male	PIC	33.2
Cing	24h	Male	PIC	29.8
Cing	24h	Male	PIC	30.1
Cing	24h	Male	PIC	26.8
Cing	24h	Male	PIC	28.6
Cing	7d	Male	Sal	13.3
Cing	7d	Male	Sal	20.4
Cing	7d	Male	Sal	15.3
Cing	7d	Male	Sal	14.3
Cing	7d	Male	Sal	7.6
Cing	7d	Male	Sal	9.7
Cing	7d	Male	PIC	20.3
Cing	7d	Male	PIC	15.9
Cing	7d	Male	PIC	16.9
Cing	7d	Male	PIC	9.9
Cing	7d	Male	PIC	11.9
Cing	7d	Male	PIC	21
Cing	24h	Female	Sal	20.2
Cing	24h	Female	Sal	7.6
Cing	24h	Female	Sal	9.9
Cing	24h	Female	Sal	7.3
Cing	24h	Female	Sal	5.7
Cing	24h	Female	Sal	5.9
Cing	24h	Female	PIC	26.5
Cing	24h	Female	PIC	41.7
Cing	24h	Female	PIC	34.1
Cing	24h	Female	PIC	42.9
Cing	24h	Female	PIC	44
Cing	7d	Female	Sal	12.4
Cing	7d	Female	Sal	9.9
Cing	7d	Female	Sal	7.9
Cing	7d	Female	Sal	17.2
Cing	7d	Female	Sal	13.6
Cing	7d	Female	PIC	14.1
Cing	7d	Female	PIC	21.9
Cing	7d	Female	PIC	25.8
Cing	7d	Female	PIC	32.1

## Sheet: Iba1 IF
Region	Time	Sex	Rx	IF	IF Log10
CA1	24h	Male	Poly I:C	695185119	8.84
CA1	24h	Male	Poly I:C	801124539	8.9
CA1	24h	Male	Poly I:C	1021381676	9.01
CA1	24h	Male	Poly I:C	1125481479	9.05
CA1	24h	Male	Poly I:C	2071177621	9.32
CA1	24h	Male	Sal	49809497	7.7
CA1	24h	Male	Sal	57284666	7.76
CA1	24h	Male	Sal	370293226	8.57
CA1	24h	Male	Sal	484265079	8.69
CA1	24h	Male	Sal	621173376	8.79
CA1	7d	Male	Poly I:C	162371500	8.21
CA1	7d	Male	Poly I:C	262117414	8.42
CA1	7d	Male	Poly I:C	307289271	8.49
CA1	7d	Male	Poly I:C	375488205	8.57
CA1	7d	Male	Poly I:C	1114652609	9.05
CA1	7d	Male	Poly I:C	1364427961	9.13
CA1	7d	Male	Sal	123352426	8.09
CA1	7d	Male	Sal	300446834	8.48
CA1	7d	Male	Sal	477541243	8.68
CA1	7d	Male	Sal	577821293	8.76
CA1	7d	Male	Sal	587681268	8.77
CA1	7d	Male	Sal	743286849	8.87
CA1	24h	Female	Poly I:C	959264639	8.98
CA1	24h	Female	Poly I:C	1047494666	9.02
CA1	24h	Female	Poly I:C	1138678663	9.06
CA1	24h	Female	Poly I:C	1428036281	9.15
CA1	24h	Female	Poly I:C	1857938814	9.27
CA1	24h	Female	Poly I:C	2457644429	9.39
CA1	24h	Female	Sal	56395697	7.75
CA1	24h	Female	Sal	66379738	7.82
CA1	24h	Female	Sal	610375230	8.79
CA1	24h	Female	Sal	617081522	8.79
CA1	24h	Female	Sal	751616053	8.88
CA1	7d	Female	Poly I:C	509341065	8.71
CA1	7d	Female	Poly I:C	710059049	8.85
CA1	7d	Female	Poly I:C	1206708106	9.08
CA1	7d	Female	Poly I:C	1301144118	9.11
CA1	7d	Female	Poly I:C	1449651127	9.16
CA1	7d	Female	Poly I:C	1643181032	9.22
CA1	7d	Female	Sal	48394873	7.68
CA1	7d	Female	Sal	80944465	7.91
CA1	7d	Female	Sal	106710610	8.03
CA1	7d	Female	Sal	702788941	8.85
CA1	7d	Female	Sal	759492083	8.88
CA1	7d	Female	Sal	918622042	8.96
CIN	24h	Male	Poly I:C	629997778	8.8
CIN	24h	Male	Poly I:C	728106741	8.86
CIN	24h	Male	Poly I:C	903264273	8.96
CIN	24h	Male	Poly I:C	988291616	8.99
CIN	24h	Male	Poly I:C	1725997853	9.24
CIN	24h	Male	Sal	7496603	6.87
CIN	24h	Male	Sal	12031609	7.08
CIN	24h	Male	Sal	246810313	8.39
CIN	24h	Male	Sal	382039726	8.58
CIN	24h	Male	Sal	483994096	8.68
CIN	24h	Male	Sal	643945315	8.81
CIN	7d	Male	Poly I:C	157676949	8.2
CIN	7d	Male	Poly I:C	240570041	8.38
CIN	7d	Male	Poly I:C	278665434	8.45
CIN	7d	Male	Poly I:C	281276606	8.45
CIN	7d	Male	Poly I:C	549653244	8.74
CIN	7d	Male	Poly I:C	992845977	9
CIN	7d	Male	Sal	180334077	8.26
CIN	7d	Male	Sal	239616376	8.38
CIN	7d	Male	Sal	298890675	8.48
CIN	7d	Male	Sal	390083564	8.59
CIN	7d	Male	Sal	481284454	8.68
CIN	24h	Female	Poly I:C	616104686	8.79
CIN	24h	Female	Poly I:C	741419931	8.87
CIN	24h	Female	Poly I:C	899076740	8.95
CIN	24h	Female	Poly I:C	980943068	8.99
CIN	24h	Female	Poly I:C	1139341164	9.06
CIN	24h	Female	Poly I:C	1870866978	9.27
CIN	24h	Female	Sal	63596386	7.8
CIN	24h	Female	Sal	93138194	7.97
CIN	24h	Female	Sal	249076496	8.4
CIN	24h	Female	Sal	397568524	8.6
CIN	24h	Female	Sal	498995219	8.7
CIN	7d	Female	Poly I:C	427567205	8.63
CIN	7d	Female	Poly I:C	525813333	8.72
CIN	7d	Female	Poly I:C	830382740	8.92
CIN	7d	Female	Poly I:C	1186285779	9.07
CIN	7d	Female	Poly I:C	1214326294	9.08
CIN	7d	Female	Sal	59792099	7.78
CIN	7d	Female	Sal	106201008	8.03
CIN	7d	Female	Sal	109759394	8.04
CIN	7d	Female	Sal	459522491	8.66
CIN	7d	Female	Sal	659031012	8.82
CIN	7d	Female	Sal	914752090	8.96
DG	24h	Male	Poly I:C	869590456	8.94
DG	24h	Male	Poly I:C	993637631	9
DG	24h	Male	Poly I:C	1342308784	9.13
DG	24h	Male	Poly I:C	1826437863	9.26
DG	24h	Male	Poly I:C	3449382327	9.54
DG	24h	Male	Sal	31791006	7.5
DG	24h	Male	Sal	44349793	7.65
DG	24h	Male	Sal	333897480	8.52
DG	24h	Male	Sal	538879772	8.73
DG	24h	Male	Sal	773961551	8.89
DG	7d	Male	Poly I:C	159607791	8.2
DG	7d	Male	Poly I:C	226333097	8.35
DG	7d	Male	Poly I:C	294887415	8.47
DG	7d	Male	Poly I:C	297996943	8.47
DG	7d	Male	Poly I:C	654187962	8.82
DG	7d	Male	Poly I:C	1224513198	9.09
DG	7d	Male	Sal	132987068	8.12
DG	7d	Male	Sal	289185395	8.46
DG	7d	Male	Sal	455383563	8.66
DG	7d	Male	Sal	518610407	8.71
DG	7d	Male	Sal	571837412	8.76
DG	24h	Female	Poly I:C	1248557361	9.1
DG	24h	Female	Poly I:C	1601481290	9.2
DG	24h	Female	Poly I:C	1748838177	9.24
DG	24h	Female	Poly I:C	2505559788	9.4
DG	24h	Female	Poly I:C	3258009508	9.51
DG	24h	Female	Sal	45969407	7.66
DG	24h	Female	Sal	51793940	7.71
DG	24h	Female	Sal	56083076	7.75
DG	24h	Female	Sal	464567053	8.67
DG	24h	Female	Sal	484197126	8.69
DG	24h	Female	Sal	486760769	8.69
DG	7d	Female	Poly I:C	516681749	8.71
DG	7d	Female	Poly I:C	522753886	8.72
DG	7d	Female	Poly I:C	822380630	8.92
DG	7d	Female	Poly I:C	1352093263	9.13
DG	7d	Female	Poly I:C	1377175450	9.14
DG	7d	Female	Poly I:C	1567379108	9.2
DG	7d	Female	Sal	52076599	7.72
DG	7d	Female	Sal	55055163	7.74
DG	7d	Female	Sal	89771765	7.95
DG	7d	Female	Sal	482035767	8.68
DG	7d	Female	Sal	520847051	8.72
DG	7d	Female	Sal	572698481	8.76
THAL	24h	Male	Poly I:C	380090869	8.58
THAL	24h	Male	Poly I:C	434376621	8.64
THAL	24h	Male	Poly I:C	635968367	8.8
THAL	24h	Male	Poly I:C	734058642	8.87
THAL	24h	Male	Poly I:C	855652897	8.93
THAL	24h	Male	Sal	8208836	6.91
THAL	24h	Male	Sal	14434084	7.16
THAL	24h	Male	Sal	305466942	8.48
THAL	24h	Male	Sal	388665369	8.59
THAL	24h	Male	Sal	420283745	8.62
THAL	7d	Male	Poly I:C	184085086	8.27
THAL	7d	Male	Poly I:C	219110269	8.34
THAL	7d	Male	Poly I:C	255110575	8.41
THAL	7d	Male	Poly I:C	365357354	8.56
THAL	7d	Male	Poly I:C	847008723	8.93
THAL	7d	Male	Sal	83471715	7.92
THAL	7d	Male	Sal	250616430	8.4
THAL	7d	Male	Sal	417881154	8.62
THAL	7d	Male	Sal	519873512	8.72
THAL	7d	Male	Sal	621745862	8.79
THAL	24h	Female	Poly I:C	773072418	8.89
THAL	24h	Female	Poly I:C	793274849	8.9
THAL	24h	Female	Poly I:C	1039809185	9.02
THAL	24h	Female	Poly I:C	1188723074	9.08
THAL	24h	Female	Poly I:C	1480042203	9.17
THAL	24h	Female	Sal	16392889	7.21
THAL	24h	Female	Sal	32315749	7.51
THAL	24h	Female	Sal	254079784	8.4
THAL	24h	Female	Sal	279411130	8.45
THAL	24h	Female	Sal	313637380	8.5
THAL	7d	Female	Poly I:C	295596704	8.47
THAL	7d	Female	Poly I:C	370704807	8.57
THAL	7d	Female	Poly I:C	592407155	8.77
THAL	7d	Female	Poly I:C	1057282476	9.02
THAL	7d	Female	Poly I:C	1059627615	9.03
THAL	7d	Female	Poly I:C	1519442483	9.18
THAL	7d	Female	Sal	17588092	7.25
THAL	7d	Female	Sal	36286616	7.56
THAL	7d	Female	Sal	59030921	7.77
THAL	7d	Female	Sal	316311691	8.5
THAL	7d	Female	Sal	414791411	8.62
THAL	7d	Female	Sal	577920649	8.76

## Sheet: MSD
Sample	IFN-γ	IL-10	IL-12p70	IL-1β	IL-2	IL-4	IL-5	IL-6	KC/GRO	TNF-α	IP-10 (pg/100ug protein)	MCP-1	CHOP
PF 24-1	0.110607	5.77642	30.8717	0.470944	0.184497	0.237726	0.665743	10.8925	3.30907	0.410529	355.053	31.3144	241.5
PF 24-2	0.0940478	7.35864	28.8998	0.4632	0.293265	0.313651	0.761454	12.3746	2.73509	0.448568	321.568	44.9893	263
PF 24-3	0.0773966	6.2226	23.573	0.677024	0.105971	0.495737	0.601441	9.82433	3.24943	0.369511	395.48	32.179	225
PF 24-4	0.075831	5.68542	17.6683	0.826235	0.070558	0.125099	0.440822	8.01359	2.07987	0.426767	1660.93	57.8544	198.5
PF 24-5	0.104406	6.52872	16.8996	0.711333	ND	0.226275	0.474042	8.69791	2.93138	0.401891	2147.65	76.4492	235
PF 24-6	0.0981955	6.00892	25.4168	0.521204	0.0889956	0.295141	0.695853	11.0207	3.15285	0.377977	566.22	27.0954	248.5
PF 7-1	0.0616505	4.05319	#DIV/0!	0.270317	ND	0.15772	0.294859	5.61938	1.75422	0.173509	13.1679	1.53506	143
PF 7-2	0.0595869	5.81715	17.6726	0.319283	ND	0.157726	0.452414	7.58862	2.0922	0.24313	20.8018	1.85017	164
PF 7-3	ND	4.95749	11.968	0.375838	ND	0.106572	0.377955	7.64758	2.32449	0.225924	13.8344	1.87872	189.5
PF 7-4	0.0632466	3.45714	7.27321	0.30353	ND	0.0652252	0.244363	5.70558	2.10656	0.148499	11.0894	1.5389	160.5
PF 7-5	0.071128	2.9245	13.4999	0.244776	ND	0.106117	0.335742	6.94482	2.06568	0.165983	17.0035	1.56266	172
PF 7-6	0.056922	4.20974	15.1596	0.303561	ND	0.265628	0.365105	7.60155	2.41501	0.179286	20.3859	1.94777	175
PM 24-1	0.145557	5.05953	31.2975	0.542399	0.287068	0.356207	0.618975	10.7448	3.13662	0.448003	163.697	6.97223	273.5
PM 24-2	0.147606	5.4467	20.5171	0.469006	ND	0.290826	0.591469	10.3143	3.54756	0.381208	684.447	41.4537	220
PM 24-3	0.104385	5.09089	19.4555	0.354412	ND	0.227499	0.467821	8.41765	3.25862	0.33572	969.212	46.3649	210
PM 24-4	0.119888	4.52782	14.1432	0.877773	ND	0.350586	0.554927	9.47585	2.78651	0.394827	640.282	40.3214	254
PM 24-5	0.105396	4.08006	27.3415	0.563633	0.0956639	0.334649	0.661478	10.776	2.66129	0.485366	1265.3	38.979	280.5
PM 24-6	0.117313	7.3059	32.4631	0.548188	0.0729016	0.486556	0.637909	10.9755	3.79094	0.40881	698.38	51.1055	248.5
PM 7-1	0.0726806	4.23179	22.0084	0.248704	ND	0.141312	0.370402	8.27437	1.76404	0.210408	12.3276	1.72761	177.5
PM 7-2	0.0579817	4.42411	7.87649	0.223091	ND	0.269777	0.267041	5.66607	2.25521	0.184507	13.205	1.59724	168
PM 7-3	0.0394802	4.8403	17.8748	0.455453	ND	0.126826	0.380714	6.87893	1.62847	0.277348	11.3808	1.99404	172.5
PM 7-4	0.0711221	5.43236	19.2359	0.424302	ND	0.171388	0.390809	8.20963	2.03067	0.256256	9.45682	1.44178	184.5
PM 7-5	0.0405451	6.13656	12.6309	0.299723	ND	0.119934	0.345548	8.21615	2.32688	0.223658	10.9966	1.54693	188
PM 7-6	0.0669343	3.81273	6.86135	0.272282	ND	0.136261	0.254118	5.83211	2.38512	0.163051	12.3709	1.79853	164
SF 24-1	0.0878156	6.97961	21.4921	0.414629	ND	0.417476	0.466758	8.45071	2.17868	0.22423	14.044	1.7353	209
SF 24-2	0.093492	7.45125	28.0764	0.434129	0.162183	0.414965	0.539195	10.2564	2.65776	0.319329	12.1109	1.69371	215
SF 24-3	0.0805279	6.73202	16.2411	0.287972	ND	0.276601	0.498556	8.47677	2.78184	0.265961	15.0853	1.769	200.5
SF 24-4	0.093492	5.87333	19.4743	0.289923	ND	0.186681	0.404892	7.83073	2.77108	0.272214	15.5407	1.86797	198.5
SF 24-5	0.0794381	4.95298	16.9569	0.319181	ND	0.229142	0.461567	7.94191	2.66346	0.262503	13.8098	2.10547	189.5
SF 24-6	0.103373	6.36243	25.7885	0.49029	0.0527755	0.16457	0.577758	11.072	2.38395	0.317065	12.544	2.48007	200
SF 7-1	0.0532093	5.07529	19.8676	0.319244	ND	0.0832198	0.417464	8.08538	1.93607	0.222499	7.43673	1.53503	190.5
SF 7-2	0.0537895	5.4645	17.8533	0.315324	ND	0.157808	0.354835	6.85217	1.29751	0.149121	9.46917	1.24193	169.5
SF 7-3	0.0405021	5.40714	14.5554	0.447661	ND	0.243632	0.331294	7.19482	1.66429	0.234492	6.5415	1.48316	158.5
SF 7-4	0.0490357	5.11636	4.41335	0.252643	ND	0.251266	0.329851	7.19486	1.7321	0.185668	16.8193	1.82818	169.5
SF 7-5	0.0373477	4.96376	7.04834	0.280131	ND	0.0748453	0.352401	6.46957	1.79836	0.201818	13.9393	1.89381	170
SF 7-6	0.0244652	5.36812	17.0625	0.29189	ND	0.137146	0.345548	6.56214	2.03671	0.252271	9.44443	1.22469	158
SM 24-1	0.0595767	4.61808	15.7728	0.317303	ND	0.727009	0.43115	8.22257	2.67184	0.21752	11.1639	1.86093	194
SM 24-2	0.103373	6.42026	26.1589	0.303637	0.145949	0.236033	0.593898	11.0591	3.0675	0.309138	13.3964	2.22913	244.5
SM 24-3	0.082073	4.82257	11.8443	0.280062	ND	0.347202	0.404534	7.51567	2.74794	0.205848	9.87334	1.9434	176
SM 24-4	0.133254	6.06626	21.4594	0.437971	ND	0.230046	0.570628	10.3335	2.60373	0.331199	14.1674	2.42722	229
SM 24-5	0.10383	4.23704	20.5617	0.34271	0.056923	0.63646	0.499986	9.05471	3.06851	0.265915	19.9026	2.5539	212
SM 24-6	0.123491	6.20594	14.6669	0.244776	ND	0.424158	0.401125	8.38555	2.83664	0.220204	13.2914	2.02932	191
SM 7-1	0.0940478	3.53389	19.6723	0.381682	ND	0.337167	0.4659	9.64389	1.92037	0.28758	12.6924	2.11296	172.5
SM 7-2	0.0773951	5.33843	12.6594	0.439914	ND	0.169616	0.360701	7.64753	1.44892	0.244839	10.3205	1.51518	186
SM 7-3	0.0825728	4.31478	18.6665	0.428311	ND	0.13017	0.359171	7.19442	1.6705	0.221253	8.60394	1.3519	155.5
SM 7-4	0.0579958	4.84474	11.2478	0.375834	ND	0.201225	0.373885	7.60151	2.22184	0.239097	9.94144	1.51522	170.5
SM 7-5	0.047977	5.35058	16.4474	0.408899	ND	0.0467533	0.298321	8.04648	1.20347	0.191442	16.5613	1.64035	168
SM 7-6	0.071128	4.43913	5.09453	0.242736	ND	0.0904955	0.252638	5.91863	1.91291	0.22767	10.3514	1.57825	158
